# Supplementary material
Source: Springer Nature journal article supplement (https://www.springermedizin.de/resource/supplementary/12891_2013_1916_MOESM5_ESM.pdf/9508800)

**Neck - ITT**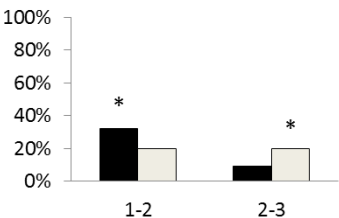**Neck - Cases**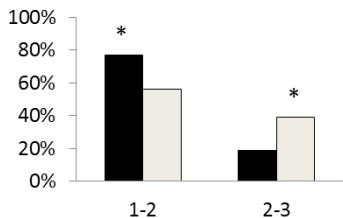**R-Shoulder - ITT**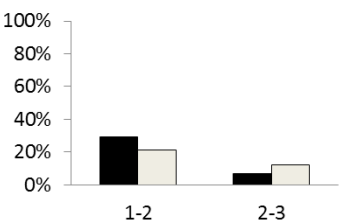**R-Shoulder - Cases**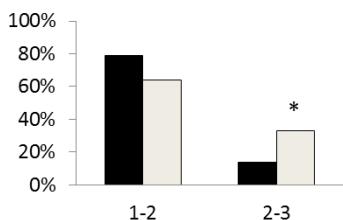**R-Hand - ITT**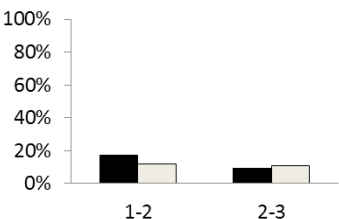**R-Hand - Cases**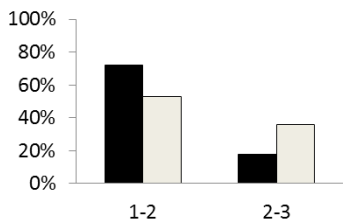**Upper Back - ITT**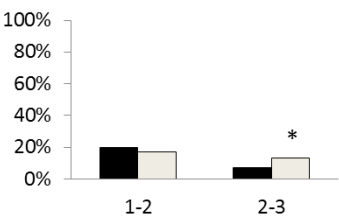**Upper Back - Cases**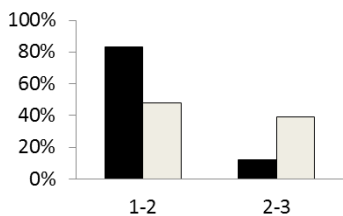**Low Back - ITT**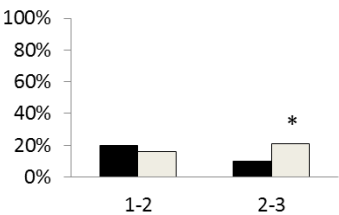**Low Back - Cases**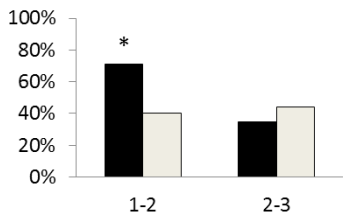

Supplement: MOESM5 [file 9508800]
